# Supplementary material
Source: PubMed Central journal article supplement (PMC6465122)
Supplement: NIHMS1014574-supplement-1.pdf [file NIHMS1014574-supplement-1.pdf]

Supplemental Table 1, Sample set information. A different number of Panc-1 cells were used in each sample set. There is 333 ng protein/channel for C/R.

|                     | <b>126</b> | <b>127N</b> | <b>127C</b> | <b>128N</b> | <b>128C</b> | <b>129N</b> | <b>129C</b> | <b>130N</b> | <b>130C</b> | <b>131N</b> | <b>131</b> |
|---------------------|------------|-------------|-------------|-------------|-------------|-------------|-------------|-------------|-------------|-------------|------------|
| <b>Sample Set_1</b> | 30         | 30          | 30          | blank       | blank       | C/R         | C/R         | C/R         | C/R         | C/R         | C/R        |
| <b>Sample Set_2</b> | 30         | 30          | 30          | blank       | blank       | C/R         | C/R         | C/R         | C/R         | C/R         | C/R        |
| <b>Sample Set_3</b> | 31         | 31          | 16          | 9           | blank       | C/R         | C/R         | C/R         | C/R         | C/R         | C/R        |
| <b>Sample Set_4</b> | 12         | 11          | 11          | blank       | blank       | C/R         | C/R         | C/R         | C/R         | C/R         | C/R        |
| <b>C/R sample</b>   | C/R        | C/R         | C/R         | C/R         | C/R         | C/R         | C/R         | C/R         | C/R         | C/R         | C/R        |

\*C/R, carrier/reference
